# Supplementary material for: A common class of transcripts with 5′-intron depletion, distinct early coding sequence features, and N1-methyladenosine modification
Source: PubMed Central journal article supplement (PMC5311483; doi:10.1261/rna.059105.116), 2017-03

293T\_hnRNPA1\_WT

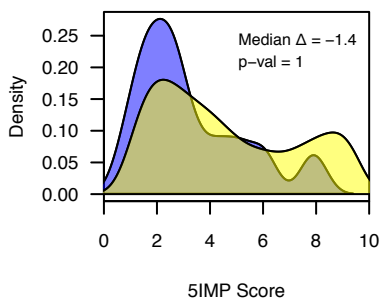

293T\_hnRNPF\_WT

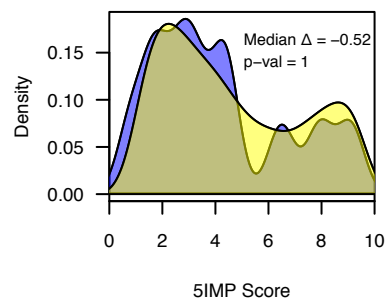

293T\_hnRNPM\_WT

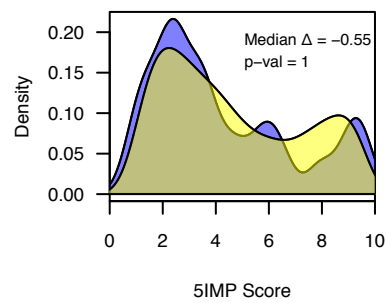

293T\_hnRNPU\_WT

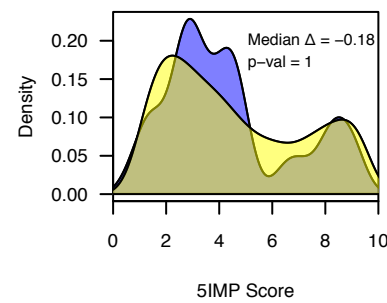

FlpInHEK293\_HA-FMR-iso1\_WT

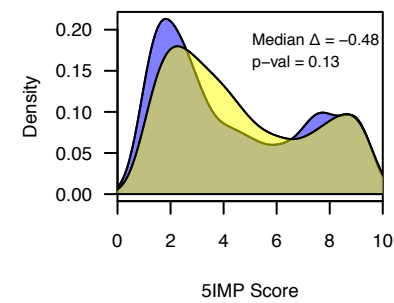

FlpInHEK293\_HA-FMR-iso7\_WT

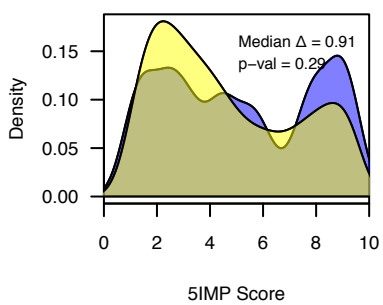

FlpInHEK293\_FXR1\_WT

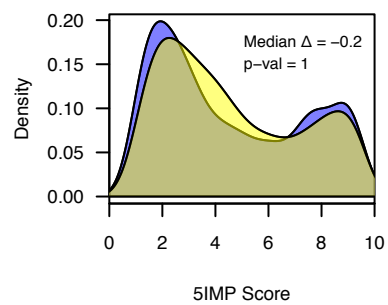

FlpInHEK293\_FXR2\_WT

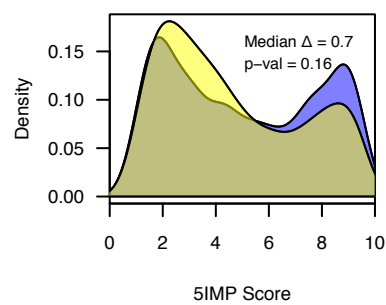

HEK293\_Ago2\_WT

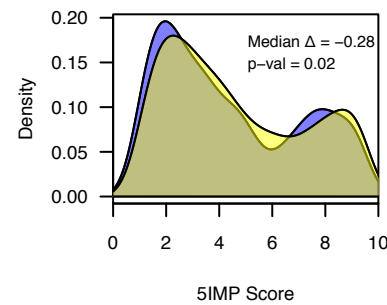

HEK293\_Cflm59\_WT

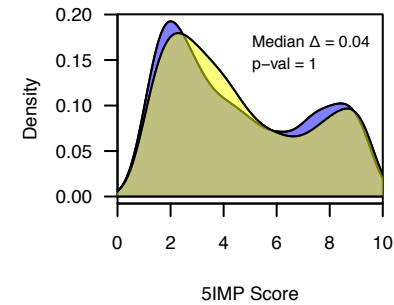

HEK293\_Cflm68\_WT

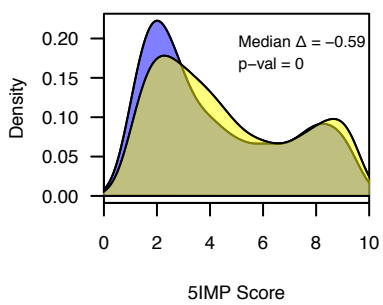

HEK293\_Fip1\_WT

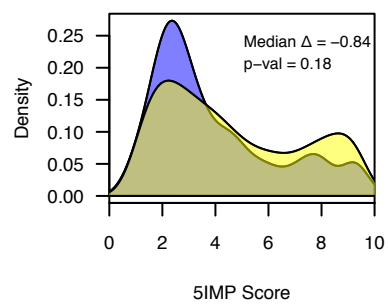

HEK293\_hnRNPU\_WT

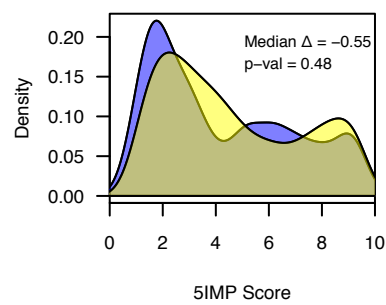

HEK293\_HuR\_WT

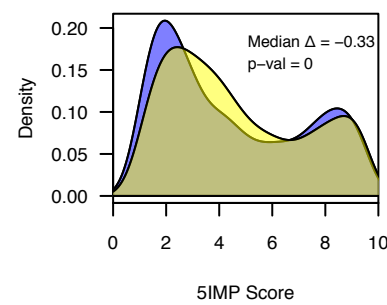

HEK293\_IGF2BP1 (anti-flag)\_WT

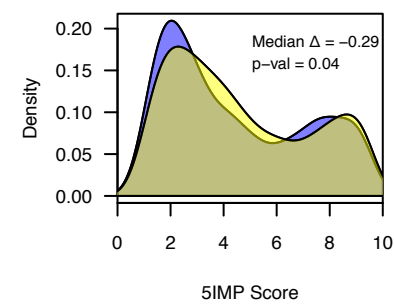

HEK293\_IGF2BP2 (anti-flag)\_WT

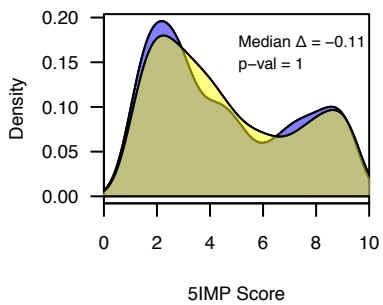

HEK293\_IGF2BP3 (anti-flag)\_WT

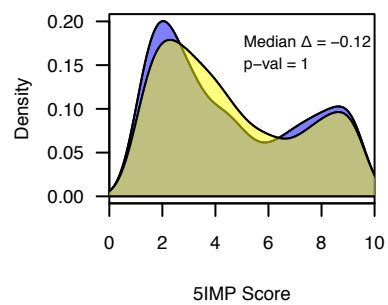

HEK293\_MOV10\_WT

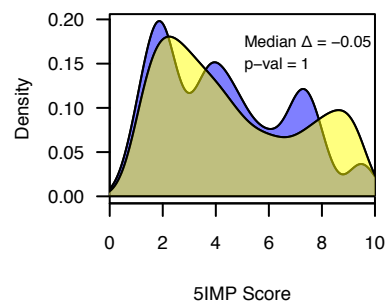

HEK2939\_Cflm25\_WT

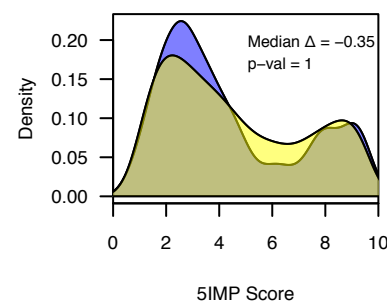

HeLa\_Ago2\_PtbKD

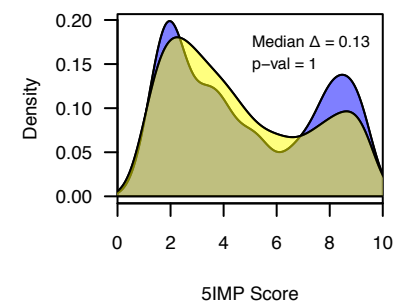

HeLa\_Ago2\_WT

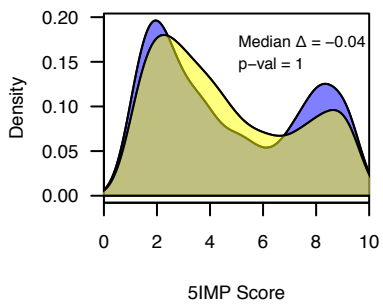

HeLa\_eIF4AIII\_WT

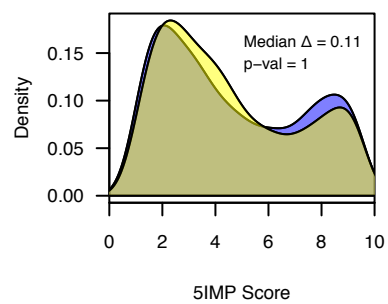

HeLa\_hnRNPU\_WT

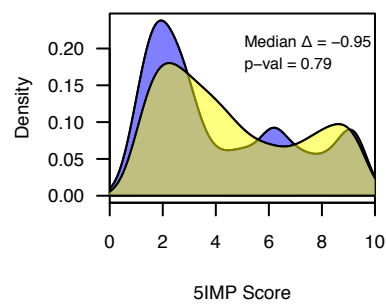

HeLa\_PTB\_WT

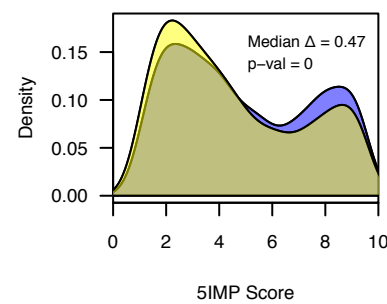

MDA-MB-231\_hnRNPA2B1\_WT

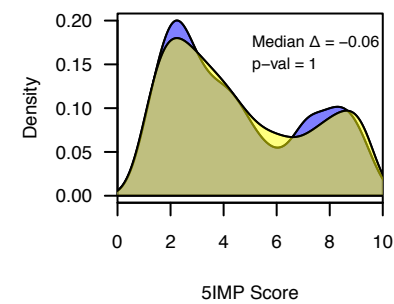

Supplement: supp_059105.116_Figure_S2.pdf [file supp_059105.116_Figure_S2.pdf]
