# Supplementary material for: A common class of transcripts with 5′-intron depletion, distinct early coding sequence features, and N1-methyladenosine modification
Source: PubMed Central journal article supplement (PMC5311483; doi:10.1261/rna.059105.116), 2017-03

SSCR

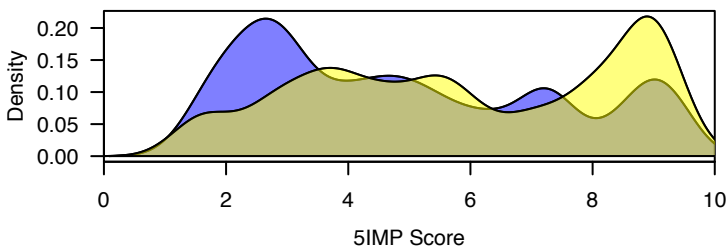

MSCR

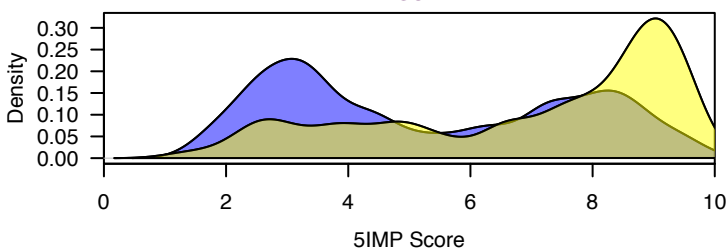

SSCR- / MSCR- / SignalP+

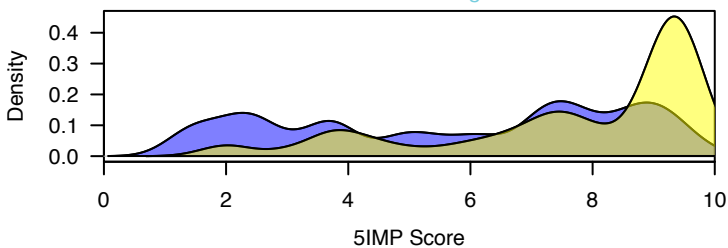

SSCR- / MSCR- / SignalP-

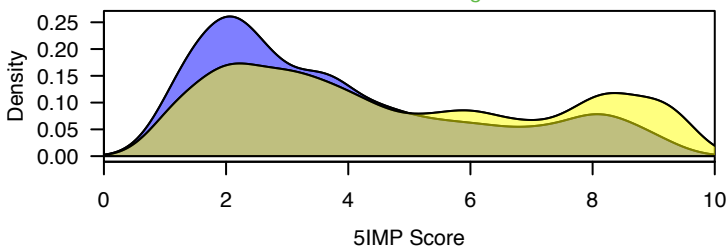

Supplement: supp_059105.116_Figure_S7.pdf [file supp_059105.116_Figure_S7.pdf]
